# Supplementary material for: The atomic-scale structure of LaCrO3–NaTaO3 solid solution photocatalysts with enhanced electron population
Source: Royal Society of Chemistry journal article supplement (doi:10.1039/c8cp07688j), 2019-01-01
Supplement: c8cp07688j1.pdf [file c8cp07688j1.pdf]

# **Atom-scale structure of $\text{LaCrO}_3\text{-NaTaO}_3$ solid solution photocatalysts with enhanced electron population**

Hanggara Sudrajat,<sup>a,\*</sup> Yizhong Zhou,<sup>a</sup> Takuro Sasaki,<sup>b</sup> Nobuyuki Ichikuni,<sup>b</sup>

Hiroshi Onishi<sup>a</sup>

<sup>a</sup>*Department of Chemistry, Graduate School of Science, Kobe University, Kobe 657-8501, Japan*

<sup>b</sup>*Department of Applied Chemistry and Biotechnology, Graduate School of Engineering, Chiba  
University, Chiba 263-8522, Japan*

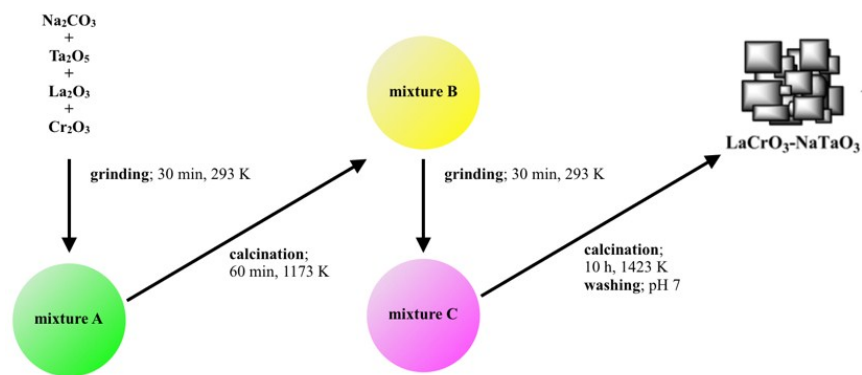

**Figure S1.** Illustration of the preparation of LaCr-NTO through the solid-state route.

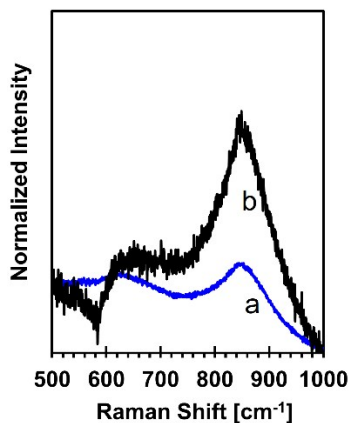

**Figure S2.** Raman spectra of a: LaCr-NTO (50+50 mol%) and b: LaCr-NTO (75+75 mol%).

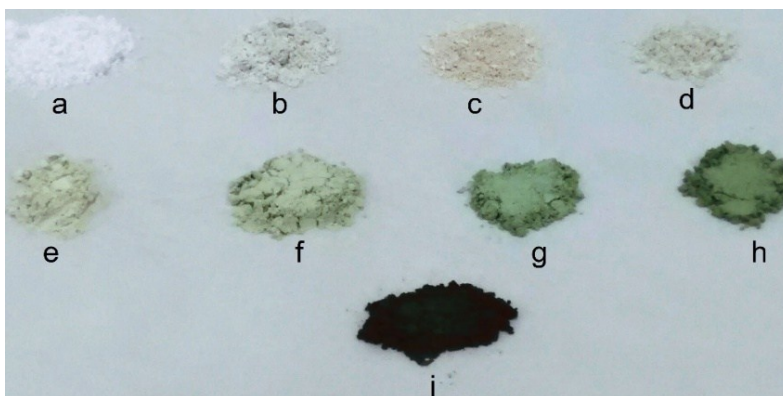

**Figure S3.** Photographs of a: NTO, b: LaCr-NTO (1+1 mol%), c: LaCr-NTO (2+2 mol%), d: LaCr-NTO (4+4 mol%), e: LaCr-NTO (8+8 mol%), f: LaCr-NTO (20+20 mol%), g: LaCr-NTO (50+50 mol%), h: LaCr-NTO (75+75 mol%), and i:  $\text{LaCrO}_3$

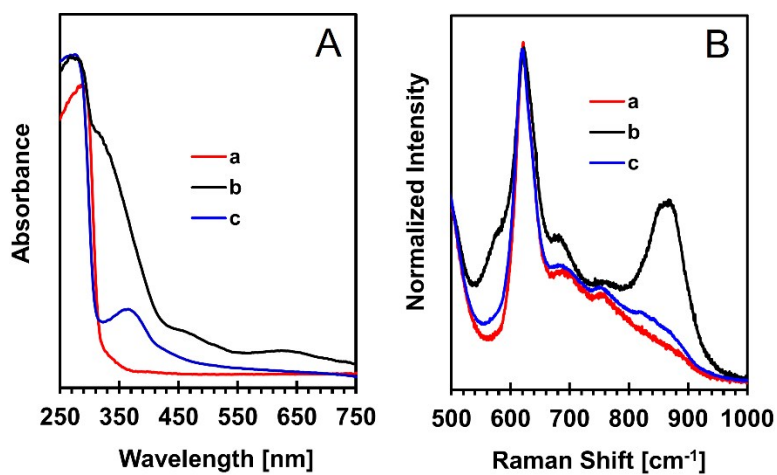

**Figure S4.** (A) DR spectra and (B) Raman spectra of a: NTO, b: LaCr-NTO (4+4 mol%), and c: the physical mixture of 50 wt% La-NTO (4 mol%) and 50 wt% Cr-NTO (4 mol%).

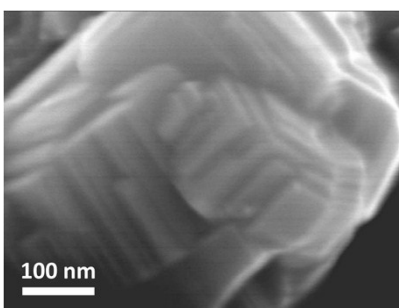

**Figure S5.** SEM image of La-NTO (2 mol%).

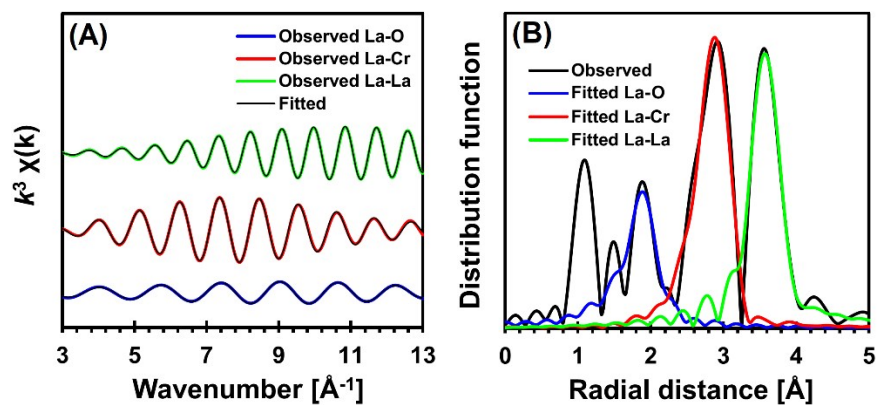

**Figure S6.** Comparison between observed and fitted EXAFS spectra at the La *K*-edge of LaCrO<sub>3</sub> in (A) *k* space and (B) *R* space.

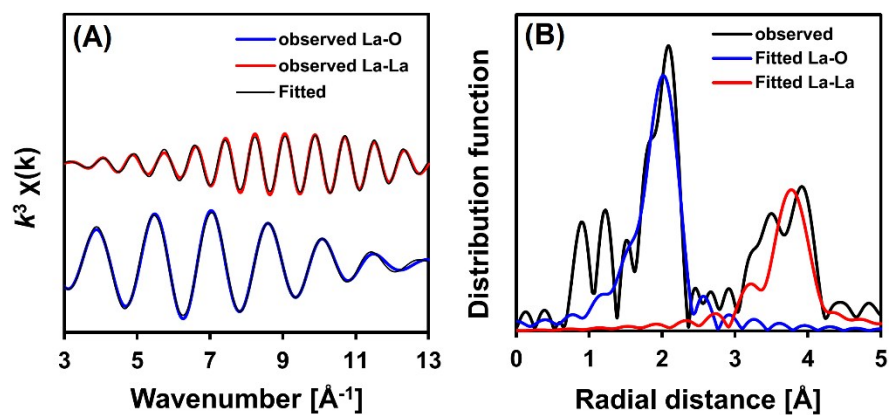

**Figure S7.** Comparison between observed and fitted EXAFS spectra at the La *K*-edge of La<sub>2</sub>O<sub>3</sub> in (A) *k* space and (B) *R* space.
